# Supplementary material for: Photocatalytic Degradation of Acid Orange 7 by NiO-TiO2/TiO2 Bilayer Film Photo-Chargeable Catalysts
Source: MDPI journal article supplement (doi:10.3390/coatings13010141), 2023-01-10
Supplement: s1 [file s1]

Archive with 1 entries (1 files):
- coatings-2124077-supplementary.pdf
