# Supplementary material for: Photocatalytic Degradation of Acid Orange 7 by NiO-TiO2/TiO2 Bilayer Film Photo-Chargeable Catalysts
Source: MDPI journal article supplement (doi:10.3390/coatings13010141), 2023-01-10
Supplement: s1 [file s1 › coatings-2124077-supplementary.pdf]

# Supplementary Materials: Photocatalytic Degradation of Acid Orange 7 by NiO-TiO<sub>2</sub>/TiO<sub>2</sub> Bilayer Film Photo-Chargeable Catalysts

Chanagun Wongburapachart <sup>1</sup>, Phuwadej Pornaroontham <sup>1</sup>, Kyusung Kim <sup>2</sup> and Pramoch Rangsunvigit <sup>1,3,\*</sup>

<sup>1</sup> The Petroleum and Petrochemical College, Chulalongkorn University, Bangkok 10330, Thailand

<sup>2</sup> Department of Chemical Systems Engineering, Graduate School of Engineering, Nagoya University, Nagoya 464-8603, Japan

<sup>3</sup> Center of Excellence on Petrochemical and Materials Technology, Bangkok 10330, Thailand

\* Correspondence: pramoch.r@chula.ac.th

## Structural properties obtained from XRD data calculation

The structural properties of crystallite sizes ( $D$ ), strain ( $\epsilon$ ), and dislocation density ( $\delta$ ) of BLF photocatalysts were calculated using the XRD data with the method from Igenepo John, et al. [1], Khot, et al. [2], and Goktas, et al. [3]. Debye-Scherrer equation (Eq. (1)) was used to estimate the size of crystal

$$D = \frac{K\lambda}{\beta \cos \theta} \quad (1)$$

where  $D$  is crystallite size in nm,  $K$  is the Scherrer constant, 0.94.  $\lambda$  represents the X-ray wavelength, which is from CuK $\alpha$  at 0.154 nm.  $\beta$  is a full width half maximum (FWHM) of a peak at Bragg's angle ( $\theta$ ).

Microstrain and dislocation energy were calculated using equations (2) and (3), respectively.

**Citation:** Wongburapachart, C.; Pornaroontham, P.; Kim, K.; Rangsunvigit, P. Photocatalytic Degradation of Acid Orange 7 by NiO-TiO<sub>2</sub>/TiO<sub>2</sub> Bilayer Film Photo-Chargeable Catalysts. *Coatings* **2023**, *13*, 141. <https://doi.org/10.3390/coatings13010141>

Academic Editors: Jumei Li and Alexandru Enesca

Received: 12 December 2022

Revised: 6 January 2023

Accepted: 9 January 2023

Published: 10 January 2023

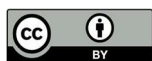

**Copyright:** © 2023 by the authors.

Submitted for possible open access publication under the terms and conditions of the Creative Commons Attribution (CC BY) license (<https://creativecommons.org/licenses/by/4.0/>).

$$\varepsilon = \frac{\beta}{4 \tan \theta} \quad (2)$$

$$\delta = \frac{1}{D^2} \quad (3)$$

In addition, the lattice constants of TiO<sub>2</sub> and NiO phases were determined by using equation below:

$$\frac{1}{d_{hkl}^2} = \frac{h^2}{a^2} + \frac{k^2}{b^2} + \frac{l^2}{c^2} \quad (4)$$

where  $d_{hkl}$  is the interplanar distance, and  $h, k, l$  are the Miller indices. For anatase TiO<sub>2</sub>, which is a tetragonal crystal, the lattice constants are  $a = b \neq c$ , while NiO, a face-centered cubic, has the lattice constants of  $a = b = c$ .

**Table S1.** Average crystallite size, microstrain, dislocation density, lattice constants, and volume cell of BLF photocatalysts.

| Sample    | TiO <sub>2</sub> Anatase |                      |          | Lattice constants |       |                   | NiO phase            |                      |          | Lattice constants |                   |
|-----------|--------------------------|----------------------|----------|-------------------|-------|-------------------|----------------------|----------------------|----------|-------------------|-------------------|
|           | $D_{\text{average}}$     | $\varepsilon$        | $\delta$ | $a=b$             | $c$   | Volume cell       | $D_{\text{average}}$ | $\varepsilon$        | $\delta$ | $a=b=c$           | Volume cell       |
|           | (nm)                     | (#/nm <sup>2</sup> ) | (Å)      | (Å)               | (Å)   | (Å <sup>3</sup> ) | (nm)                 | (#/nm <sup>2</sup> ) | (Å)      | (Å)               | (Å <sup>3</sup> ) |
| 39-300BLF | 12.16                    | 0.0103               | 0.0068   | 3.784             | 9.465 | 135.49            | 6.61                 | 0.0141               | 0.0229   | 4.178             | 72.95             |
| 52-300BLF | 13.43                    | 0.0094               | 0.0055   | 3.779             | 9.543 | 136.29            | 6.12                 | 0.0152               | 0.0267   | 4.178             | 72.94             |
| 62-300BLF | 15.66                    | 0.0088               | 0.0041   | 3.776             | 9.446 | 134.64            | 7.04                 | 0.0132               | 0.0202   | 4.178             | 72.92             |
| 69-300BLF | 16.20                    | 0.0081               | 0.0038   | 3.784             | 9.348 | 133.83            | 6.44                 | 0.0144               | 0.0241   | 4.173             | 72.67             |
| 52-250BLF | 9.14                     | 0.0136               | 0.0120   | 3.780             | 9.402 | 134.36            | 5.47                 | 0.0170               | 0.0334   | 4.176             | 72.84             |
| 52-350BLF | 8.54                     | 0.0148               | 0.0137   | 3.780             | 9.585 | 136.92            | 5.90                 | 0.0158               | 0.0287   | 4.174             | 72.71             |
| 52-400BLF | 9.29                     | 0.0134               | 0.0116   | 3.784             | 9.348 | 133.83            | 7.12                 | 0.0132               | 0.0197   | 4.181             | 73.08             |

## References

1. Goktas, Abdullah, Esra Aslan, Ferit Arslan, and Ahmet Kilic. "Characterization of Multifunctional Solution-Processed Sn1-Xznxs Nanostructured Thin Films for Photosensitivity and Photocatalytic Applications." *Optical Materials* **2022**, 133, 112984 <https://doi.org/10.1016/j.optmat.2022.112984>.
2. Khot, A. C., N. D. Desai, K. V. Khot, M. M. Salunkhe, M. A. Chougule, T. M. Bhave, R. K. Kamat, K. P. Musselman, and T. D. Dongale. "Bipolar Resistive Switching and Memristive Properties of Hydrothermally Synthesized Tio2 Nanorod Array: Effect of Growth Temperature." *Materials & Design* **151** **2018**, 151, 37–47. <https://doi.org/10.1016/j.matdes.2018.04.046>.
3. Igenepo John, Kingsley, Abraham Abdul Adenle, Aderemi Timothy Adeleye, Ifeoma Pearl Onyia, Christianah Amune-Matthews, and Martins O. Omorogie. "Unravelling the Effect of Crystal Dislocation Density and Microstrain of Titanium Dioxide Nanoparticles on Tetracycline Removal Performance." *Chemical Physics Letters* **2021**, 776, 138725, <https://doi.org/10.1016/j.cplett.2021.138725>.

**Disclaimer/Publisher's Note:** The statements, opinions and data contained in all publications are solely those of the individual author(s) and contributor(s) and not of MDPI and/or the editor(s). MDPI and/or the editor(s) disclaim responsibility for any injury to people or property resulting from any ideas, methods, instructions or products referred to in the content.
